# Supplementary material
Source: PubMed Central journal article supplement (PMC7890217)
Supplement: NIHMS1668875-supplement-1.pdf [file NIHMS1668875-supplement-1.pdf]

Figure S1. Diagram Flow

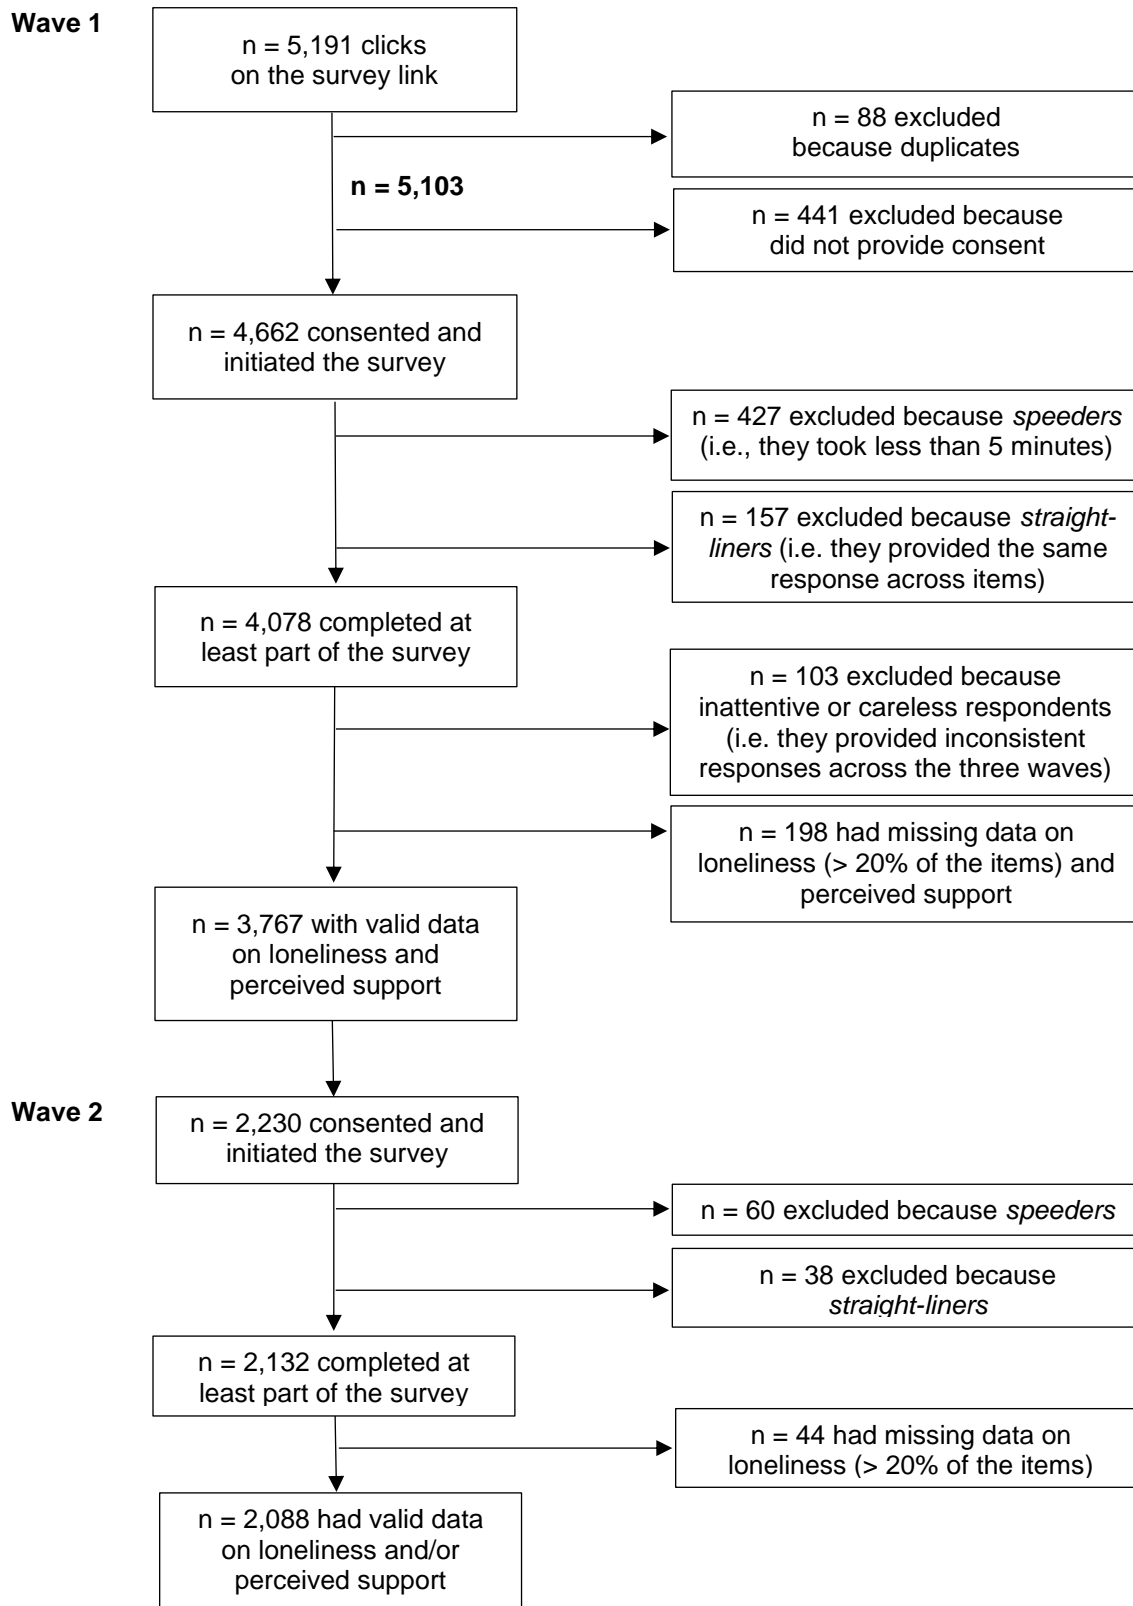

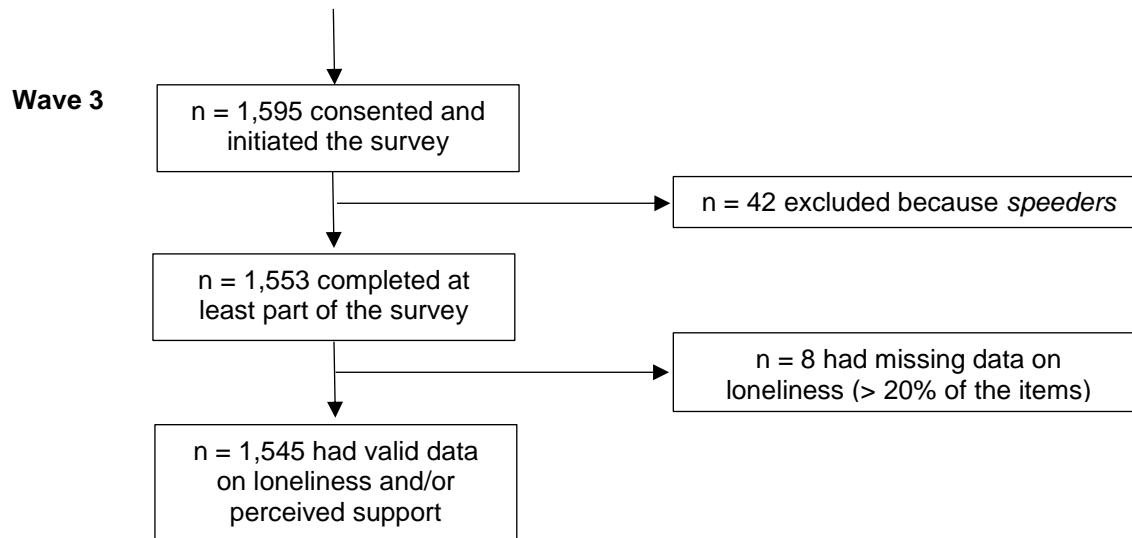**Notes**

Straight-liners are those who straight-line on questionnaires with reverse coded items (e.g., personality questionnaires).
